# Supplementary material for: Comparative Modelling of Organic Anion Transporting Polypeptides: Structural Insights and Comparison of Binding Modes
Source: Molecules. 2022 Dec 3;27(23):8531. doi: 10.3390/molecules27238531 (PMC9738416; doi:10.3390/molecules27238531)
Supplement: Supplementary file 1 [file molecules-27-08531-s001.zip › molecules-2026282-supplementary.pdf]

## Supporting Information

# Comparative Modelling of Organic Anion Transporting Polypeptides (OATPs): Structural Insights and Comparison of Binding Modes

Arun Kumar Tonduru <sup>1</sup>, Santosh Kumar Adla <sup>1,2</sup>, Kristiina M. Huttunen <sup>1</sup>, Thales Kronenberger <sup>1,3\*</sup> and Antti Poso <sup>1,3\*</sup>

1. School of Pharmacy, Faculty of Health Sciences, University of Eastern Finland, P.O. Box 1627, 70211 Kuopio, Finland
2. Institute of Organic Chemistry and Biochemistry (IOCB), Czech Academy of Sciences, Flemingovo Namesti 542/2, 160 00 Prague, Czech Republic
3. Department of Internal Medicine VIII, University Hospital Tuebingen, Otfried-Müller-Strasse 14, Tuebingen DE 72076, Germany. Department of Pharmaceutical and Medicinal Chemistry, Institute of Pharmaceutical Sciences, Eberhard-Karls-Universität, Tuebingen, Auf der Morgenstelle 8, 72076 Tuebingen, Germany. Cluster of Excellence iFIT (EXC 2180) "Image-Guided and Functionally Instructed Tumor Therapies", University of Tübingen, 72076 Tuebingen, Germany. Tuebingen Center for Academic Drug Discovery & Development (TüCAD2), 72076 Tuebingen, Germany

\*Author to whom correspondence should be addressed. T.K, A.P.

### List of Tables:

- Table S1:** Model validation report from Ramachandran plots
- Table S2:** SiteMap scores for the binding site regions of OATPs. SiteMap prediction for the potential binding sites in all OATPs. The SiteScore is >0.8 for all the OATPs which depicts the druggability of the sites. The table also includes the metrics calculated by the SiteMap Volume, size, Hydrophobic, hydrophilic and donor/acceptor sites. SiteMap scores for the binding site regions of OATPs.
- Table S3:** RMSD (Transmembrane helices) calculated by aligning alpha fold models and our OATP models.

### List of Figures:

- Figure S1:** OATP1A2 alignment with 6E9N and 1TGS
- Figure S2:** OATP1B1 alignment with 6E9N and 1TGS
- Figure S3:** OATP1B3 alignment with 6E9N and 1TGS
- Figure S4:** OATP1C1 alignment with 6E9N and 1TGS
- Figure S5:** OATP2A1 alignment with 6E9N and 1TGS
- Figure S6:** OATP2B1 alignment with 6E9N and 1TGS

- Figure S7:** OATP3A1 alignment with 6E9N and 1TGS
- Figure S8:** OATP4A1 alignment with 6E9N and 1TGS
- Figure S9:** OATP4A1 alignment with 6E9N and 1TGS
- Figure S10:** OATP5A1 alignment with 6E9N and 1TGS
- Figure S11:** OATP6A1 alignment with 6E9N and 1TGS
- Figure S12:** Distances along the molecular dynamics simulations of OATPs. A) Distance between Ser/Thr on TM2 vs Glu on TM1 observed along the simulations. B) Distance between Ser/Thr on TM2 vs Lys on TM7.
- Figure S13:** Identity and similarity matrices of binding sites of OATPs: A) Identity matrix of binding sites of OATPs. B) Similarity matrix of binding sites of OATPs.
- Figure S14:** Classification of OATPs based on the interactions observed in the molecular dynamics simulations.
- Figure S15:** Frequency of protein-ligand interactions along the molecular dynamics simulation trajectories are shown in bubble graphs, the residues are named according to OATP1A2, and the corresponding aligned residues could be referred from Figure 3B. E3S was docked and shown in all the above docking poses. A) Hydrogen bond interactions. B) Water mediated interactions. C) Hydrophobic interactions. D) All interactions combined (Hydrogen bond, water mediated, hydrophobic).
- Figure S16:** Multiple sequence alignment highlighting conserved residues and motifs.
- Figure S17:** Electrostatic potential surfaces along the pore of Class 1(A-C), class 2(D,E) and class 3 (F-H) OATP transporters
- Figure S18:** Hydrophobic surface volumes along the pore of Class 1(A-C), class 2(D,E) and class 3 (F-H) OATP transporters
- Figure S19:** A) Hydrophobic volumes shown in the table, B) Hydrophobic volumes shown in bars for each OATP transporter
- Figure S20:** A-H) Pore diameter vs X-coordinates shown for their respective OATP transporters.
- Figure S21:** I-K) Pore diameter vs X-coordinates shown for OATP4C1, OATP5A1 and OATP6A1.

**Table S1:** Model validation report from Ramachandran plots

| Protein | Ramachandran Favored region residue percentage | Number of residues in disallowed region |
|---------|------------------------------------------------|-----------------------------------------|
| OATP1A2 | 96.0%                                          | 4                                       |
| OATP1B1 | 96.8%                                          | 1                                       |
| OATP1B3 | 95.9%                                          | 3                                       |
| OATP1C1 | 96.6%                                          | 5                                       |
| OATP2A1 | 94.9%                                          | 1                                       |
| OATP2B1 | 97.0%                                          | 2                                       |
| OATP3A1 | 96.2%                                          | 6                                       |
| OATP4A1 | 96.9%                                          | 1                                       |
| OATP4C1 | 96.8%                                          | 2                                       |
| OATP5A1 | 96.2%                                          | 3                                       |
| OATP6A1 | 96.5%                                          | 3                                       |

**Table S2:** SiteMap scores for the binding site regions of OATPs. SiteMap prediction for the potential binding sites in all OATPs. The SiteScore is >0.8 for all the OATPs which depicts the druggability of the sites. The table also includes the metrics calculated by the SiteMap Volume, size, Hydrophobic, hydrophilic and donor/acceptor sites.

| OATP    | SiteScore | Volume (Å) | Size | Hydrophobic | Hydrophilic | Donor/Acceptor |
|---------|-----------|------------|------|-------------|-------------|----------------|
| OATP1A2 | 1.11      | 1264       | 359  | 1.51        | 0.72        | 1.01           |
| OATP1B1 | 1.13      | 1556       | 539  | 1.50        | 0.81        | 1.36           |
| OATP1B3 | 1.17      | 605        | 202  | 1.45        | 0.85        | 0.88           |
| OATP1C1 | 1.08      | 1288       | 457  | 1.14        | 0.89        | 1.09           |
| OATP2A1 | 1.19      | 549        | 197  | 1.63        | 0.75        | 1.07           |
| OATP2B1 | 1.20      | 739        | 341  | 2.26        | 0.66        | 0.78           |
| OATP3A1 | 1.23      | 335        | 162  | 2.57        | 0.66        | 2.59           |
| OATP4A1 | 1.12      | 1627       | 586  | 1.26        | 0.93        | 1.62           |
| OATP4C1 | 1.20      | 971        | 356  | 2.47        | 0.63        | 1.96           |
| OATP5A1 | 1.13      | 1276       | 523  | 1.58        | 0.82        | 0.86           |
| OATP6A1 | 1.16      | 760        | 238  | 1.61        | 0.79        | 1.72           |

**Table S3:** RMSD (Transmembrane helices) calculated by aligning alpha fold models and our OATP models



```

      1      10      20      30      40      50      60      70      80      90
OATP1B3 MDQHQLNKTAESASSEKKKTRRCNGFKMFAALSFSTAKATGGTMMKISITQERRRFDSSSLACLIDGSEIGNLVIVFVSFVGSKLHHPKL
6E9N    · i00 ····· i10 ····· i20 ····· i30 ····· i40 ····· i50 ····· i60 ····· i70 ····· i80 ····· i90 ·····
OATP1B3 IGIGCLLMGTGSILTSLPHFFMGYYRYSKETHINPSENSTSSLSTCLINQTLFNGTSPEIVEKDCVKESGSHMWIVFVGMNMLRIGIGTPIVILG
6E9N    YFLAIFGWSVAITLFGFAT····· 220 ····· 230 ····· 240 ····· 250 ····· 260 ····· GLMSLIGLRATIGFAPAFETN
OATP1B3 ISYIDDFAKLGHSSLYLGSNAIGMIGVIGFAGSLFAKMYVDIGYVDLSTIRITPKDSRWVGAWVGLFVLSGLFSISSIPFFFLPKNPKNPKQK
6E9N    NRMVTSWFFPHERASAVGFYTSQQFVGLAFLTPHLIWIQEML····· 340 ····· 350 ····· SHHWVIVTGTGIGITVSLIHWKQVYQPPRLTKG
OATP1B3 ERKISLSLHVLTNDNRNQTANLTNQGNVTKNVTGFFQSLKSILTNPLYVIFLLTLTQVSSFIGSFYVFKYMEQYQSSASHANFLIGITITIP
6E9N    IS· 350 ····· 400 ····· 410 ····· 420 ····· 430 ····· 440 ····· 450 ····· 460 ····· 470 ····· 480 ·····
OATP1B3 TVATGMFICGFIKKFKLSLVGIKFSFLTSMISFIFLLYFELICESKSVAGLTITDYDGNNSVASHVDVPLSYCNSECNDESQWEPVCGNNGIT
6E9N    AAFVGVLSGWVADLLVRKGFSLGFARKTPIICGLHISTCIMGANYT····· 540 ····· 550 ····· 560 ····· 570 ·····
OATP1B3 YLSPCLAGCKSSSSGIKKHTVFYNCSCVEVTGLQNRNYSAHLGECPRDNTCTRKFFIVVAIQVINSLSFATGGTTFILITVKIVQELKALAMGFQS
6E9N    · 580 ····· 590 ····· 600 ····· 610 ····· 620 ····· 630 ····· 640 ····· 650 ····· 660 ····· 670 ·····
OATP1B3 MVIRTGGGLAPIIYFCALIDKTCMKWSTNSCQAQGACRIYNSVFFGVYVGLSIALRFPALVLYIVFIFAMKKKFQGKDKASNERKVMDEANLE
6E9N    NFAAGCLGGLITVPLVVGGLAQGYGFA····· 700 ····· PALVYISAVALIGALSIVLLVGDVKKR·····
OATP1B3 FLNNGEHFVPSAGTDSKTCNLDMQDNAAAAN
6E9N
OATP1B3 VDVPLSYCNSE.CNCDSESWEPVCGNNGITYLSPCLAGCKSSSGI..KKHTVIFY.NCSC
1TGS    SPQREATCTSEVSGCP.KIYNPVCGTDGITYSNECVL.CSENKKRQTPVLIQKSG..PC
      460      470      480      490      500

```

Figure S3: OATP1B3 alignment with 6E9N and 1TGS

```

      1      10      20      30      40      50      60      70      80      90
OATP1C1 MDTSSKENIQLFCKTSVQPVGRPSFKTEYPSSEKQPCCGELKVFCLALS.FVYFAKALAEYIKSTITQERRRFDIPSSLVGVIDGSEIGNLV
6E9N    · i00 ····· i10 ····· i20 ····· i30 ····· i40 ····· i50 ····· i60 ····· i70 ····· i80 ····· i90 ·····
OATP1C1 ITFVSYFGAKLHHPKIIICAGCVIMGVCTLLIAMPQFFMEQKYERYSPSSNSTLISISPCLESSSSQLPVSVMEKSKSKISNECEVDTSSSMWIYVF
6E9N    QIPGGWFLRVGRSVTYTIAIFGWSVATLFGGFAT····· 230 ····· 240 ····· 250 ····· 260 ····· 270 ····· 280 ·····
OATP1C1 LGNLLRGICETPTQPLGIAYLDDFASIDNAFYICGVQTVAIICPIFGFLIGSLCAKLYVDIGFVNLDHITITPKDPQWVG..AWWGLVYLIACIT
6E9N    GLRATIGFIBAPAFETNNRMVTSWFFPHERASAVGFYTSQQFVGLAFLTPHLI····· 340 ····· 350 ····· 360 ····· 370 ····· 380 ·····
OATP1C1 SLIAAVPFWYLPKSLPRSQRSDSNSSEKSKFIIDHTDYQTPQGENAKIMEMARDLPSLKNLFGNPVYFLYLCTSTVQFNSLFGMVVYKPKYIT
6E9N    GTIWSLIVKQVYQPPRLT····· 400 ····· 410 ····· 420 ····· 430 ····· 440 ····· 450 ····· 460 ····· 470 ····· 480 ·····
OATP1C1 EQQYQSSSRANFVIGLINIPAVLGIIFSGIVMKKFRISVCGAAKLYLGSVPFGYLLFLSLFALGENSEDVAGLTVSYQGTKPVSYHERALFSDC
6E9N    TOEKGITALKAGQMTTTP.FLAFAVGVLLSGVADLLVRKGFSLGFARKTPIICGLHISTCIMGANYT····· 550 ····· 560 ····· 570 ·····
OATP1C1 NSRCKCSETKWPMCGENGITYVSACLACQTSNRSKGNIIFYNCCTCVGIAASKSGNSSGIVGRCQKDNCGCPOMFLYFLVITSVITSLTSLGGHPG
6E9N    · 580 ····· 590 ····· 600 ····· 610 ····· 620 ····· 630 ····· 640 ····· 650 ····· 660 ····· 670 ·····
OATP1C1 YILPVRCLIPOLKSFALCIYTLARVACIPAPVYGVILIDTSLCKWGFKRCGSRGSCRLYDSNVFRHIYGLTVILGTVSTLSHAVLFIKKNY
6E9N    670 ····· 680 ····· 690 ····· 700 ····· 710 ····· 720 ····· 730 ····· 740 ····· 750 ····· 760 ····· 770 ·····
OATP1C1 VSKHRSFITKRRTMVSTRFQKENYTTSDHLLQPNYWPGETQL
6E9N
OATP1C1 ERALFSDCNSR.CKCSSEKWEPMCGENGITYVSACLACQTSNRS..GKNITIFY.NCTC
1TGS    SPQREATCTSEVSGCP.KIYNPVCGTDGITYSNECVL.CSENKKRQTEVLIQKSG..PC
      470      480      490      500      510      520

```

Figure S4: OATP1C1 alignment with 6E9N and 1TGS

```

      1      10      20      30      40      50      60      70      80      90
OATP2A1 MGLLPKLGASQGSdTSTSRAGRCARSVFGNIKVFVLCQGLLQLCQLLYS..AYFKSSLTTEKRFGSLSSSSGLTSSSLNEISNATLIVFVSFVGS
6E9N    · i00 ····· i10 ····· i20 ····· i30 ····· i40 ····· i50 ····· i60 ····· i70 ····· i80 ····· i90 ·····
OATP2A1 RVHRRPRLICIGGLFLAAGAFILTLPHFLSEPYQYTLASTGNNRSLQAECLQKHWDLPSPKCHSTTQNPQKETSSMWGLMVVAQLLAGIGTVPPIOF
6E9N    RVGSRVTTYTIAIFGWSVATLFGGFAT····· 220 ····· 230 ····· 240 ····· 250 ····· 260 ····· 270 ····· 280 ·····
OATP2A1 FGISYVDDFSEPSNSPLYTISILFAISVFGPAGYLGSVMLQIFVDYGRVNTAAVNLVPGDPRWIGAWLGLTSSALLVITISFFFFFRAMPIT
6E9N    TNNRMVTSWFFPHERASAVGFYTSQFVGLAFLTPHLIWIQEMLS····· 330 ····· 340 ····· 350 ····· 360 ····· 370 ····· 380 ·····
OATP2A1 ...GAKRAPATADEARKLEPAKSRGSLVDFIKRFPCIFLRLLMNSLFLVVLVLAQCTFSVITAGLSFELNKFHEKQYGTSAANYANFLIGAVNLPAA
6E9N    KGISKAELDYIRDGGGLVDGDAFL····· 410 ····· 420 ····· 430 ····· 440 ····· 450 ····· 460 ····· 470 ····· 480 ·····
OATP2A1 ALGMHFGCGLMKRFVFSLQAIFRTATITITISMLICVPLFFMGCSPTTVAEVYPPSTSSSIHPQSPACRRDCSPDSIFHPVCGDNGIEYLSPCA
6E9N    FVGVLISGNVADLLVRKGFSLGFARKTPIICGLHISTCIMGANYT····· 520 ····· 530 ····· 540 ····· 550 ····· 560 ····· 570 ·····
OATP2A1 GCSNINMSSATSQKLIYINCSCVTGGSASAKTGSCVPVCAHFLLPALFLLSFVSLIACISHNPLYMMVLRVNVQEEKSFATGVQELLMRLTAWLPS
6E9N    570 ····· 580 ····· 590 ····· 600 ····· 610 ····· 620 ····· 630 ····· 640 ····· 650 ····· 660 ····· 670 ·····
OATP2A1 PALYGLTIDHSCIRWNSLCLGRRGACAYYDNDALRDYRGLQMGYKALGMLLLCFISWRVKKNKKEYNVQKAAGLI
6E9N    PLVVGYLAAQGYG····· 700 ····· 710 ····· 720 ····· 730 ····· 740 ····· 750 ····· 760 ····· 770 ····· 780 ·····
OATP2A1 IHPQSPAERRD.CSCPDSIFHPVCGDNGIEYLSPCCHAGCSNINMSSATSQKLIYLNCS
1TGS    SPQREATCTSEVSGCP.KIYNPVCGTDGITYSNECVL.CSENKKRQTPVLIQKSG..PC
      440      450      460      470      480      490

```

Figure S5: OATP2A1 alignment with 6E9N and 1TGS

1 10 20 30 40 50 60 70 80 90

OATP2B1 MGPRIGPAGEVVPDQKETKATMGTEPTGGKASPDQDVRPSVFHNIKLFVLCCHSLQLQLMISGYLKSSISTVEKRFCLSSQTSGLTASFNE  
6E9N ···i00·····i10·····i20·····i30·····i40·····i50·····i60·····i70·····i80·····i90·····  
OATP2B1 VGNALIVFVSVEGSRVHRPRMIGYCAILVALAGTLMTLPHFISEPYRYDNTSPEDMPQDFKASLCPLTTSAPASAPSNNGNCSSYTETQHLSVVG  
6E9N WLYRLCOIFGGWGLDRVGSRVTYFIALFGWSVATIFOGFAT·····240·····250·····260·····270·····280·····290·····  
OATP2B1 MFVAQTLLGVGGVPIQIFGISYIDDFAHNSNSPLYLGILFAVTMMCPGLAFGTGSLMLRLYVDINQMPEGGISLTIKDPRWVGAWNLGFLIAAGAV  
6E9N LIGLRAITIGFEPAPAFETNNRMVTSWFPEHERASAVGFYTSGGQFVGLAFLETFLLIWIQ·····350·····360·····370·····380·····390·····  
OATP2B1 ALAAITPVYFFPKEMPKEKRELQFRKVLAVTDSAPARKKDDSPSKQSPGESTKKQDGLVQIAPNLTVIQFIKVFPRVLLQTLRPFIFLLVVSQVCT  
6E9N LIWSLIWVRKY·····400·····410·····420·····430·····440·····450·····460·····470·····480·····490·····  
OATP2B1 SSMAAGMALIFLKFIERQFSITASYANLIGCLSFPSVIVGVVGGVGLVKKRHHLGVGCALCLLGMILCTFFSLPFFITGSSSHQIAGITHQTS  
6E9N ASTLWFFLLWFENYITQEKGITALKAGFMTTVPFLAAFGVGLLSGWADILVRKCFSLGARKPTIICGLISTCTIMGA·····550·····560·····570·····580·····  
OATP2B1 HPGLELSPSCMEACSCPLDGFNPVCDPSTRVEYITPCHAGCSSWVVDALDNSQVFTNCSCVVEGNPVLGASCDSTCSHLVVPFLLVLSIGSALA  
6E9N ···580·····590·····600·····610·····620·····630·····640·····650·····660·····670·····680·····690·····  
OATP2B1 CLTHTPSMILIRGVKKEDKTAVCTQFMFLRIAWMPSPVIGCSAIDTTCVHWALSCGRRAVCRYNNDDLNRNFTGLQFFFKTGSVICFALVLA  
6E9N NGFASITVSSSLAFMILITGCVENFAGGGITVPLVVGCLAQGYG·····700·····710·····720·····730·····740·····750·····  
OATP2B1 VLRQDDKEARTKESRSSPAVEQQLLVSGPGKKPEDSRV  
6E9N DVKR·····  
OATP2B1 ELSPS.CMEA.CSCFLDGFNPVCDPSTRVEYITPCHAGCSSWVVDALDNSQVFTNCSC  
1TGS PQREATCTSEVSGCP.KIYNPVCGTGDTG.ITYSNECVL.CSE.NKKRQ.TPVLIQKSGPC

Figure S6: OATP2B1 alignment with 6E9N and 1TGS

1 10 20 30 40 50 60 70 80 90

OATP3A1 MQGKKPGSSGGSSGELQGDQEAQRNKKKKKVSFCFSNIKIFLVSECALMLAQGTVGAYVSVLTTLERRFNLCQADVGVITASSEFEIGNLALILFV  
6E9N ···i00·····i10·····i20·····i30·····i40·····i50·····i60·····i70·····i80·····i90·····  
OATP3A1 SYFGARGRPRRLIGCGGIVMALGALISALPEFLTHQYKYEAGEIRWGAEGRDVCAANGSGGDEGPDPLICRNRATNMMYLLIGAQVLLIGAT  
6E9N WGLDRVGSRVTYFIALFGWSVATIFOGFAT·····230·····240·····250·····260·····270·····280·····290·····  
OATP3A1 PVQGLGVSYIDDHVRRKDSSTLYICILFTMLVFCPCGFIIGSCFCTKIYVDAVIDTSNLDITPDDPRWVGAWNLGFLIAAGAV  
6E9N PAFETNNRMVTSWFPEHERASAVGFYTSGGQFVGLAFLETFLLIWIQ·····350·····360·····370·····380·····390·····  
OATP3A1 LPPHSEPAEMSEQAMLSEREYERPKPSNGVLRHLEPDSSASCFOQLRVIPKVTKHULSNPVFTCTIHAACMEITAVVAGFAAFLGKYLEQFNLIT  
6E9N PRLTSGGISKAELDYGDDGGGLVDGAPL·····420·····430·····440·····450·····460·····470·····480·····490·····  
OATP3A1 SSANQLLGMTAIPACIGFICGGLLVKKHS..LSALGAIIRMAMLVNVSTACVYSFLFLGCDTGVPAGVTVPGYGNSTAPGSALDPYSPCNNNCEC  
6E9N LKAGFMITT.VPSSLAAGVGVLSGWADILVRKCFSLGFAKPTIICGLISTCTIMGA·····540·····550·····560·····570·····580·····  
OATP3A1 QTDSTFPVCGADGITYSACFAGCNSTNLTGCACTTTPAENATVVPKCPSPGCEAFITFLCVMLCICSLIGAMAQTPSVIILIRTVSPBELKSYA  
6E9N ···580·····590·····600·····610·····620·····630·····640·····650·····660·····670·····680·····690·····  
OATP3A1 LGVFLFLRLLCGIPPIIFCAGIDSTCLFWSFTCGEQGACVLYDNVYRILYVSIATIALKSFATILYTTTWQCRLKNYKRYIKNHEGGLSTSEFF  
6E9N TGGVNFAGGICGITVPLVVGCLAQGYG·····700·····710·····720·····730·····740·····750·····  
OATP3A1 ASTLTLDNLGDPVPANQTHRTKFIYNLEDHEWCENMESVL  
6E9N ···  
OATP3A1 SALDPYSPCNNN.CECQTDSTFPVCGADGITYSACFAGCNSTN.....LTGCAC  
1TGS SPQREATCTSEVSGCP.KIYNPVCGTGDTG.ITYSNECVL.CSE.NKKRQTPVLIQKSGPC

Figure S7: OATP3A1 alignment with 6E9N and 1TGS

1 10 20 30 40 50 60 70 80 90

OATP4A1 MPLHQGLGDKPLTFPPSPNSAMENGLDHTPPSRASPGTFLSPGSLRSAAHSPLDTSKQPLCQLWAEKHGARGTHEVRYVSAGQSVACGWWAFAPPC  
6E9N ···i00·····i10·····i20·····i30·····i40·····i50·····i60·····i70·····i80·····i90·····  
OATP4A1 QVLNTPKGLFLFCAAFIQGMTVNGFTINTVITSLERRVDLHSYQSCLIASSYDIAACLCITFVSVEGSGHKPRWLWGCVLLMGTGSIVFALPHF  
6E9N ···RRRYLLTLMIFITTVVICYVDRANLAVASAHIEEPGITKAEMGVFSAFAWLYTLCQIPGGWGLDRVGSRVTYFIALFGWSVATIFOGFAT  
OATP4A1 TAGRYEVELDAGVRTCPANPAGVACADSTSGLSRYQLVFM LGQFTHGVGATPLYTLGVTYTDENVKSSCSPVYTAIFYTAAILCPAGYLIGGALLN  
6E9N 290·····300·····310·····320·····330·····340·····350·····360·····370·····380·····390·····  
OATP4A1 IYTEMGRRTETTESPLWVGAMNVGFLGSCAAAFFTAAPVILGYPRQLPGS.....QRYAVMRAAEMHQLKDSRGEASNPDFGKTIRDLPISIMLL  
6E9N 380·····390·····400·····410·····420·····430·····440·····450·····460·····470·····480·····490·····  
OATP4A1 LKNPTFLLCAGATEATLTGMSWFSKFTESQFSLSSAEATLFGYLVVPAAGGCTFTGCFVVKNTLRRCSAVIKFCLEFCTVVSITGILVFS  
6E9N 480·····490·····500·····510·····520·····530·····540·····550·····560·····570·····580·····590·····  
OATP4A1 CPSVPMAGVTASYGSSLLPEGHLNLTAPCNAACSCQPEHYSVPCGSDGLMYFSLCHAGCPAATETNVDGQKVYRDCSCIPQNLSSGFGHATAGKCT  
6E9N NYTN·····580·····590·····600·····610·····620·····630·····640·····650·····660·····670·····680·····690·····  
OATP4A1 STCQRKLLLVIFVVFIFLSSIPALTATLRVDRDPQRSFALCIQWIVVRI LGGIPGFIACWVIDKACLWQDQCGQGSCLVYQNSAMSR  
6E9N 670·····680·····690·····700·····710·····720·····730·····740·····750·····  
OATP4A1 HLMGLYKVLGVFFAIAICFLYPLSESSDGLTCLPSQSSAPDSATDSQLQSSV  
6E9N LVYISAVALICALSYILLVGDV·····  
OATP4A1 HLNLTAPC.NAACSCQPEHYSVPCGSDGLMYFSLCHAGCPAATETNVDGQKVYRDCSC  
1TGS SPQREATCTSEVSGCP.KIYNPVCGTGDTG.ITYSNECVL.CSE.NKKRQTPVLIQKSGPC

Figure S8: OATP4A1 alignment with 6E9N and 1TGS

```

      1      10      20      30      40      50      60      70      80      90
OATP4C1 MKSAGKIEENLAFVPSSPDILRRLSASPSQIEVSALSSDPQRENSQPQELQKFPQEPQKSPEPSLPSAPPNVSEKLRSLSLSEFEEGSYGWRNFHPQ
6E9N    ·i00·····i10·····i20·····i30·····i40·····i50·····i60·····i70·····i80·····i90··
OATP4C1 CLQRCNTPGGFLPHYCLLAITQGIIVNGLVNIISISTVEKRYEMKSSLTGLISSSYDISFCMLSLFVSFGERGHKPRWLAFAPMIGLGAIVFSLP
6E9N    ····RRRYLTVMVIFITVVICYVDRANLAVASAHIOEEFGITKAEMGVVFSFAFALYTCQIPGGWELDRVGSRYTYFIAIGWSVATIFQGF
OATP4C1 QFFSGEYKLGSLFEDTCVTTNRNSTCTSSSTSSLSNYIVYVILGQLLCAGGTFLYTLGTAFLLDSDVPTKSSLYICTGYAMSILCPAIGYVGGQL
6E9N    290·····300·····310·····320·····330·····340·····350·····360·····370·····380·····390·····400·····410·····420·····430·····440·····450·····460·····470·····480·····490·····500·····510·····520·····530·····540·····550·····560·····570·····580·····590·····600·····610·····620·····630·····640·····650·····660·····670·····680·····690·····700·····710·····720·····730·····740·····750·····760·····770·····780·····790·····800·····810·····820·····830·····840·····850·····860·····870·····880·····890·····900·····910·····920·····930·····940·····950·····960·····970·····980·····990·····1000·····
OATP4C1 LTIVIDVAMGESTDVTEDDPRWLGAWWIGFLLSWIFAWSLIIPFSCFPKHLPGT·····AEIQAGKTSQAHQSNSNADVKFGKSIKDFPAALKN
6E9N    380·····390·····400·····410·····420·····430·····440·····450·····460·····470·····480·····490·····500·····510·····520·····530·····540·····550·····560·····570·····580·····590·····600·····610·····620·····630·····640·····650·····660·····670·····680·····690·····700·····710·····720·····730·····740·····750·····760·····770·····780·····790·····800·····810·····820·····830·····840·····850·····860·····870·····880·····890·····900·····910·····920·····930·····940·····950·····960·····970·····980·····990·····1000·····
OATP4C1 LMKNAVFMCLIVSSTSEALITTGATFLBKFIENQFGLTSSFAATLGGAVLIPGAALCGIINGGLVSKFRMTCKNTMKFALFTSGVAITISFVFM
6E9N    480·····490·····500·····510·····520·····530·····540·····550·····560·····570·····580·····590·····600·····610·····620·····630·····640·····650·····660·····670·····680·····690·····700·····710·····720·····730·····740·····750·····760·····770·····780·····790·····800·····810·····820·····830·····840·····850·····860·····870·····880·····890·····900·····910·····920·····930·····940·····950·····960·····970·····980·····990·····1000·····
OATP4C1 AKCENEFAGVSESNGTGEELGNLIAPCNANCNCSRSYYYPVCGDGVQYFSPCFAGCSNPVAHRKPKVYVNCSCIERKTEITSTAETFGFEAKAGK
6E9N    570·····580·····590·····600·····610·····620·····630·····640·····650·····660·····670·····680·····690·····700·····710·····720·····730·····740·····750·····760·····770·····780·····790·····800·····810·····820·····830·····840·····850·····860·····870·····880·····890·····900·····910·····920·····930·····940·····950·····960·····970·····980·····990·····1000·····
OATP4C1 CETHCAKLPITICTHFFIVITFEMAGCTPITVSILRCVNRQRSLALIQFMVLRLGLTIPGPPIIFGFTIDSTCILWDINDCGIKGACWIYDNKIM
6E9N    ····670·····680·····690·····700·····710·····720·····730·····740·····750·····760·····770·····780·····790·····800·····810·····820·····830·····840·····850·····860·····870·····880·····890·····900·····910·····920·····930·····940·····950·····960·····970·····980·····990·····1000·····
OATP4C1 AHMLVAISVTCKVITMFFNGFAIFLYKPPPSATDVSFHKENAVVTNVLAEQDLNKKIVKEG
6E9N    490·····500·····510·····520·····530·····540·····550·····560·····570·····580·····590·····600·····610·····620·····630·····640·····650·····660·····670·····680·····690·····700·····710·····720·····730·····740·····750·····760·····770·····780·····790·····800·····810·····820·····830·····840·····850·····860·····870·····880·····890·····900·····910·····920·····930·····940·····950·····960·····970·····980·····990·····1000·····
OATP4C1 LGNLIAPCNANCNCSRSYYYPVCGDGVQYFSPCFAGCSNPVAH·····RKPKVYVNCSC
1TGS   SPQREATCTSEVSGCPKIYNPVCGTDGITYSNECVLCSSENKKRQTPVLIQKSGPC

```

Figure S9: OATP4C1 alignment with 6E9N and 1TGS

```

      1      10      20      30      40      50      60      70      80      90
OATP5A1 MDEGTGLQPGAGEQLEAPATAEAVQERCEPETLRSKSLPVLSSASCRPSLSPTSGDANPAFGCVDSGHEQLKQGPNFLAPSPSAPSTSAAGLDCN
6E9N    ·i00·····i10·····i20·····i30·····i40·····i50·····i60·····i70·····i80·····i90··
OATP5A1 HRVDLSKTFSVSSALAMQERRCLYVLTDSRCFLVCMFLFIQALMVSGYSSVITTHERRYSIKSSSSGLLVSCDIGNLVVVFVSFEGGRG
6E9N    ····200·····210·····220·····230·····240·····250·····260·····270·····280·····290·····300·····310·····320·····330·····340·····350·····360·····370·····380·····390·····400·····410·····420·····430·····440·····450·····460·····470·····480·····490·····500·····510·····520·····530·····540·····550·····560·····570·····580·····590·····600·····610·····620·····630·····640·····650·····660·····670·····680·····690·····700·····710·····720·····730·····740·····750·····760·····770·····780·····790·····800·····810·····820·····830·····840·····850·····860·····870·····880·····890·····900·····910·····920·····930·····940·····950·····960·····970·····980·····990·····1000·····
OATP5A1 RRLWLWLVGGLLIAPFALFALPHFISPPYQIQELNASAPNDGLCGGNSSTATLEPPACPKDSGGNNHWVYVALFHCAQILICMGSTPIYTLGPTY
6E9N    290·····300·····310·····320·····330·····340·····350·····360·····370·····380·····390·····400·····410·····420·····430·····440·····450·····460·····470·····480·····490·····500·····510·····520·····530·····540·····550·····560·····570·····580·····590·····600·····610·····620·····630·····640·····650·····660·····670·····680·····690·····700·····710·····720·····730·····740·····750·····760·····770·····780·····790·····800·····810·····820·····830·····840·····850·····860·····870·····880·····890·····900·····910·····920·····930·····940·····950·····960·····970·····980·····990·····1000·····
OATP5A1 LDDNVKKESSSLYAIMYVMGALCPAVGYLGGLLIGFYVDPNPVHLDQNDPRFIGNWWSGFLLCALAMFLVIFPMTFFPKKLPRHKKKKKKK
6E9N    510·····520·····530·····540·····550·····560·····570·····580·····590·····600·····610·····620·····630·····640·····650·····660·····670·····680·····690·····700·····710·····720·····730·····740·····750·····760·····770·····780·····790·····800·····810·····820·····830·····840·····850·····860·····870·····880·····890·····900·····910·····920·····930·····940·····950·····960·····970·····980·····990·····1000·····
OATP5A1 SVDAVSDVLDLKEKSNNSQADKKVSSMGFGKDVRLDPRAAVRILSNMTLFFVSSYTESAIVTASIHFIKFIIESQFCFASNASIVGVIVP
6E9N    510·····520·····530·····540·····550·····560·····570·····580·····590·····600·····610·····620·····630·····640·····650·····660·····670·····680·····690·····700·····710·····720·····730·····740·····750·····760·····770·····780·····790·····800·····810·····820·····830·····840·····850·····860·····870·····880·····890·····900·····910·····920·····930·····940·····950·····960·····970·····980·····990·····1000·····
OATP5A1 SACVGVLDGYYIKKDKLGARESAKAMICSGVSLICFSTLFIIVGCSINLGGINIPYITGPSLTPMHRNLTGSCNVNCGCKIHEYEPVCGSDGIT
6E9N    510·····520·····530·····540·····550·····560·····570·····580·····590·····600·····610·····620·····630·····640·····650·····660·····670·····680·····690·····700·····710·····720·····730·····740·····750·····760·····770·····780·····790·····800·····810·····820·····830·····840·····850·····860·····870·····880·····890·····900·····910·····920·····930·····940·····950·····960·····970·····980·····990·····1000·····
OATP5A1 YFNPCLAGCVNSGNLSTGIRNYTECTCVQSRQVITPTTVGQRSQRLRVVVKTYLNENGYAVSGCKRNTCLTIPFLVFLVITITACAQPSAIV
6E9N    680·····690·····700·····710·····720·····730·····740·····750·····760·····770·····780·····790·····800·····810·····820·····830·····840·····850·····860·····870·····880·····890·····900·····910·····920·····930·····940·····950·····960·····970·····980·····990·····1000·····
OATP5A1 TLRSEDEEREFALCMQFVLLRTLAYPTPTFYFCAVIDTTCMLWQCEGVQSGCWEYNVTSFRFVYFGLAGKFKVGFIFFIHAWYSIKYKEDGLO
6E9N    750·····760·····770·····780·····790·····800·····810·····820·····830·····840·····850·····860·····870·····880·····890·····900·····910·····920·····930·····940·····950·····960·····970·····980·····990·····1000·····
OATP5A1 RRRQREFFLSTVSEVGHDPNARTRSCPAFSTQGEFHEETGLQKGIQCAAQTYPGPFPEAISSADPGLEESPAALEPPS
6E9N    550·····560·····570·····580·····590·····600·····610·····620·····630·····640·····650·····660·····670·····680·····690·····700·····710·····720·····730·····740·····750·····760·····770·····780·····790·····800·····810·····820·····830·····840·····850·····860·····870·····880·····890·····900·····910·····920·····930·····940·····950·····960·····970·····980·····990·····1000·····
OATP5A1 HRNLTGSCNVNCCCKIHEYEPVCGSDGITVFNPCLAGCVNSGNLSTGIRNYTECTC
1TGS   SPQREATCTSEVSGCPKIYNPVCGTDGITYSNECVLCSSENKKRQTPVLIQKSGPC

```

Figure S10: OATP5A1 alignment with 6E9N and 1TGS

```

      1      10      20      30      40      50      60      70      80      90
OATP6A1 MFVGVARHSQSQDEVSRGVEPLEAARAQPAKDRRAKGTPKSSKPKKKHRYLRLLPEALIRFGGFRKKKKAKSSSVSKPGEVDDSLQPCGLGCLVS
6E9N    ·i00·····i10·····i20·····i30·····i40·····i50·····i60·····i70·····i80·····i90··
OATP6A1 TCCECCNNIRCFMIFYCLLIICQGVFGFLIDVSGIDFQKQVQLKTIKLALEKSYDISGIVAFIAFYGDRKKV·IWFVASSFLIGLCSLCAEP
6E9N    ····580·····590·····600·····610·····620·····630·····640·····650·····660·····670·····680·····690·····700·····710·····720·····730·····740·····750·····760·····770·····780·····790·····800·····810·····820·····830·····840·····850·····860·····870·····880·····890·····900·····910·····920·····930·····940·····950·····960·····970·····980·····990·····1000·····
OATP6A1 SINEENKQSKVGIEDICEIKVVSVCQSSGISFQSKYSFFLLGQTVOCITAGMPLYILGITFDENVATISAGIYLCIAECTSMCTCYALGYVTCAP
6E9N    290·····300·····310·····320·····330·····340·····350·····360·····370·····380·····390·····400·····410·····420·····430·····440·····450·····460·····470·····480·····490·····500·····510·····520·····530·····540·····550·····560·····570·····580·····590·····600·····610·····620·····630·····640·····650·····660·····670·····680·····690·····700·····710·····720·····730·····740·····750·····760·····770·····780·····790·····800·····810·····820·····830·····840·····850·····860·····870·····880·····890·····900·····910·····920·····930·····940·····950·····960·····970·····980·····990·····1000·····
OATP6A1 LVKVPENTTSATNTTVNNGSPFWLTTWINFLFAAVVAWCHTLPLSCFPNNMPSSTRKARKRKQLHFFDSRDKDLKLTGNIKDLCAALITMKNP
6E9N    390·····400·····410·····420·····430·····440·····450·····460·····470·····480·····490·····500·····510·····520·····530·····540·····550·····560·····570·····580·····590·····600·····610·····620·····630·····640·····650·····660·····670·····680·····690·····700·····710·····720·····730·····740·····750·····760·····770·····780·····790·····800·····810·····820·····830·····840·····850·····860·····870·····880·····890·····900·····910·····920·····930·····940·····950·····960·····970·····980·····990·····1000·····
OATP6A1 VLTCLASKATEYLVIIIGASEFLPIVIEHQFIPTPTVATTAGLVLPGGATGQVIGGVIVSTIEMSCKAMRFIMVTSVISITILVFIHFRVCNP
6E9N    480·····490·····500·····510·····520·····530·····540·····550·····560·····570·····580·····590·····600·····610·····620·····630·····640·····650·····660·····670·····680·····690·····700·····710·····720·····730·····740·····750·····760·····770·····780·····790·····800·····810·····820·····830·····840·····850·····860·····870·····880·····890·····900·····910·····920·····930·····940·····950·····960·····970·····980·····990·····1000·····
OATP6A1 VQFAGINEDYDGTGKLGNLTAPCNEKCRCSSTSYSSICGRDDIEYFSPCFAGCTYSKAQNKKMYNCSCIKEGLITDAEGDFIDARPGKCDAC
6E9N    580·····590·····600·····610·····620·····630·····640·····650·····660·····670·····680·····690·····700·····710·····720·····730·····740·····750·····760·····770·····780·····790·····800·····810·····820·····830·····840·····850·····860·····870·····880·····890·····900·····910·····920·····930·····940·····950·····960·····970·····980·····990·····1000·····
OATP6A1 YKLPFLFAFIFFSTIIFSGFSGVPIVLAMTRVVDKTRSHALGVSYVILRIPTIPSPSTFKMSGETSILRDVNNKCGHTGRCWIYNNKTKMAFLIVG
6E9N    680·····690·····700·····710·····720·····730·····740·····750·····760·····770·····780·····790·····800·····810·····820·····830·····840·····850·····860·····870·····880·····890·····900·····910·····920·····930·····940·····950·····960·····970·····980·····990·····1000·····
OATP6A1 ICFICKICTHIFTTIAFFIYKRRLNENTDFPDVTVNPKVKKKKEETDL
6E9N    500·····510·····520·····530·····540·····550·····560·····570·····580·····590·····600·····610·····620·····630·····640·····650·····660·····670·····680·····690·····700·····710·····720·····730·····740·····750·····760·····770·····780·····790·····800·····810·····820·····830·····840·····850·····860·····870·····880·····890·····900·····910·····920·····930·····940·····950·····960·····970·····980·····990·····1000·····
OATP6A1 LGNLTAPCNEKCRCSSTSYSSICGRDDIEYFSPCFAGCTYSKAQNKKMYNCSC
1TGS   SPQREATCTSEVSGCPKIYNPVCGTDGITYSNECVLCSSENKKRQTPVLIQKSGPC

```

Figure S11: OATP6A1 alignment with 6E9N and 1TGS

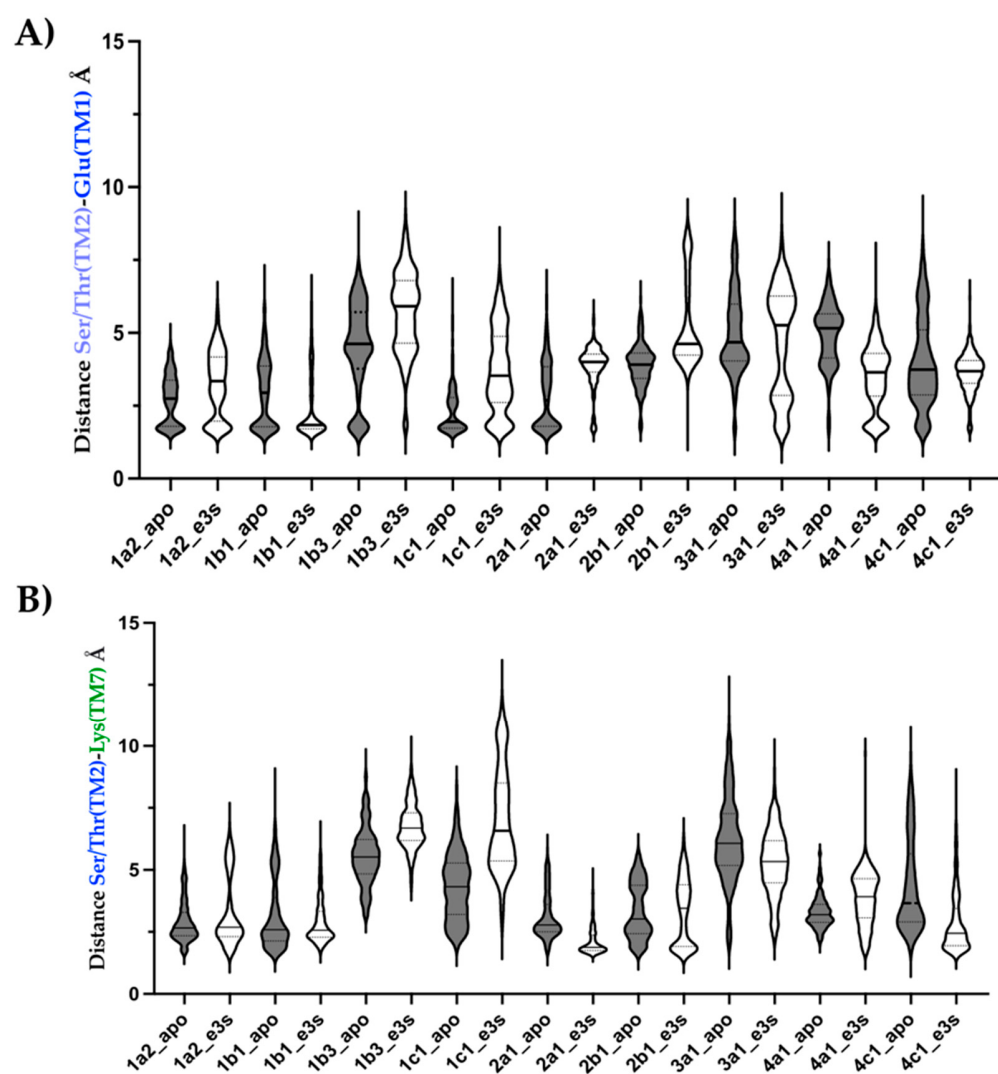

**Figure S12:** Distances along the molecular dynamics simulations of OATPs. A) Distance between Ser/Thr on TM2 vs Glu on TM1 observed along the simulations. B) Distance between Ser/Thr on TM2 vs Lys on TM7.

| Identity | OATP1A2 | OATP1B1 | OATP1B3 | OATP1C1 | OATP2A1 | OATP2B1 | OATP3A1 | OATP4A1 | OATP4C1 | OATP5A1 | OATP6A1 |
|----------|---------|---------|---------|---------|---------|---------|---------|---------|---------|---------|---------|
| OATP1A2  | 100     | 47,22   | 33,33   | 55,56   | 19,44   | 22,22   | 13,89   | 25      | 8,33    | 22,22   | 5,56    |
| OATP1B1  | 47,22   | 100     | 69,44   | 41,67   | 22,22   | 25      | 25      | 19,44   | 11,11   | 22,22   | 11,11   |
| OATP1B3  | 33,33   | 69,44   | 100     | 38,89   | 25      | 22,22   | 25      | 8,33    | 11,11   | 22,22   | 8,33    |
| OATP1C1  | 55,56   | 41,67   | 38,89   | 100     | 22,22   | 27,78   | 22,22   | 22,22   | 11,11   | 25      | 8,33    |
| OATP2A1  | 19,44   | 22,22   | 25      | 22,22   | 100     | 61,11   | 30,56   | 13,89   | 13,89   | 25      | 13,89   |
| OATP2B1  | 22,22   | 25      | 22,22   | 27,78   | 61,11   | 100     | 38,89   | 13,89   | 27,78   | 33,33   | 13,89   |
| OATP3A1  | 13,89   | 25      | 25      | 22,22   | 30,56   | 38,89   | 100     | 11,11   | 25      | 30,56   | 19,44   |
| OATP4A1  | 25      | 19,44   | 8,33    | 22,22   | 13,89   | 13,89   | 11,11   | 100     | 47,22   | 33,33   | 27,78   |
| OATP4C1  | 8,33    | 11,11   | 11,11   | 11,11   | 13,89   | 27,78   | 25      | 47,22   | 100     | 33,33   | 38,89   |
| OATP5A1  | 22,22   | 22,22   | 22,22   | 25      | 25      | 33,33   | 30,56   | 33,33   | 33,33   | 100     | 19,44   |
| OATP6A1  | 5,56    | 11,11   | 8,33    | 8,33    | 13,89   | 13,89   | 19,44   | 27,78   | 38,89   | 19,44   | 100     |

#### A. Identity matrix of binding sites of OATPs

| Similarity | OATP1A2 | OATP1B1 | OATP1B3 | OATP1C1 | OATP2A1 | OATP2B1 | OATP3A1 | OATP4A1 | OATP4C1 | OATP5A1 | OATP6A1 |
|------------|---------|---------|---------|---------|---------|---------|---------|---------|---------|---------|---------|
| OATP1A2    | 100     | 75      | 58,33   | 69,44   | 30,56   | 33,33   | 36,11   | 41,67   | 30,56   | 33,33   | 33,33   |
| OATP1B1    | 75      | 100     | 83,33   | 63,89   | 36,11   | 38,89   | 50      | 47,22   | 36,11   | 41,67   | 36,11   |
| OATP1B3    | 58,33   | 83,33   | 100     | 61,11   | 36,11   | 38,89   | 55,56   | 41,67   | 44,44   | 44,44   | 41,67   |
| OATP1C1    | 69,44   | 63,89   | 61,11   | 100     | 38,89   | 47,22   | 50      | 50      | 41,67   | 50      | 41,67   |
| OATP2A1    | 30,56   | 36,11   | 36,11   | 38,89   | 100     | 83,33   | 50      | 33,33   | 38,89   | 47,22   | 38,89   |
| OATP2B1    | 33,33   | 38,89   | 38,89   | 47,22   | 83,33   | 100     | 63,89   | 36,11   | 50      | 52,78   | 41,67   |
| OATP3A1    | 36,11   | 50      | 55,56   | 50      | 50      | 63,89   | 100     | 47,22   | 58,33   | 63,89   | 52,78   |
| OATP4A1    | 41,67   | 47,22   | 41,67   | 50      | 33,33   | 36,11   | 47,22   | 100     | 55,56   | 55,56   | 44,44   |
| OATP4C1    | 30,56   | 36,11   | 44,44   | 41,67   | 38,89   | 50      | 58,33   | 55,56   | 100     | 55,56   | 55,56   |
| OATP5A1    | 33,33   | 41,67   | 44,44   | 50      | 47,22   | 52,78   | 63,89   | 55,56   | 55,56   | 100     | 41,67   |
| OATP6A1    | 33,33   | 36,11   | 41,67   | 41,67   | 38,89   | 41,67   | 52,78   | 44,44   | 55,56   | 41,67   | 100     |

#### B. Similarity matrix of binding sites of OATPs

**Figure S13:** Identity and similarity matrices of binding sites of OATPs: A) Identity matrix of binding sites of OATPs. B) Similarity matrix of binding sites of OATPs.

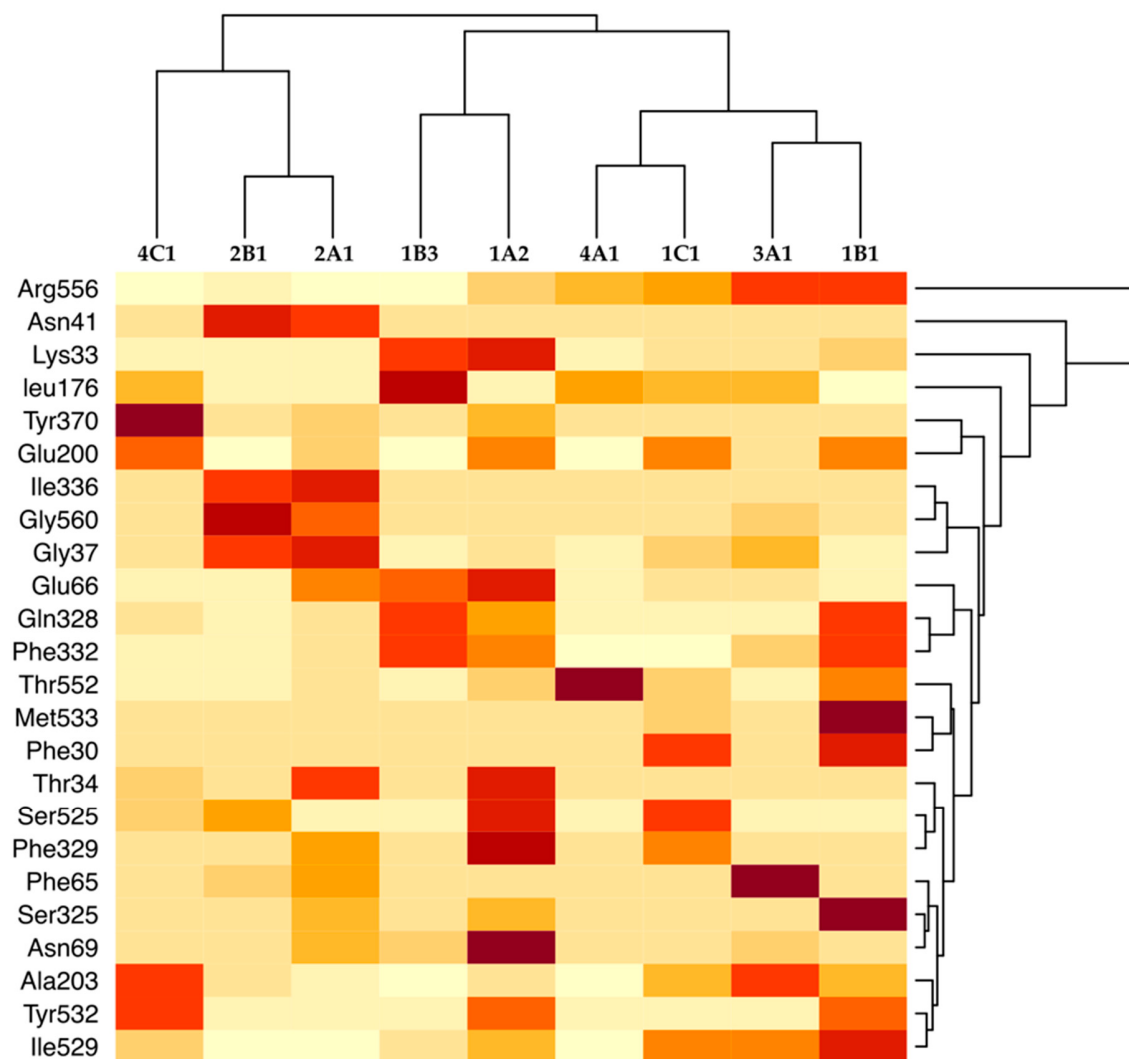

**Figure S14:** Classification of OATPs based on the interactions observed in the molecular dynamics simulations.

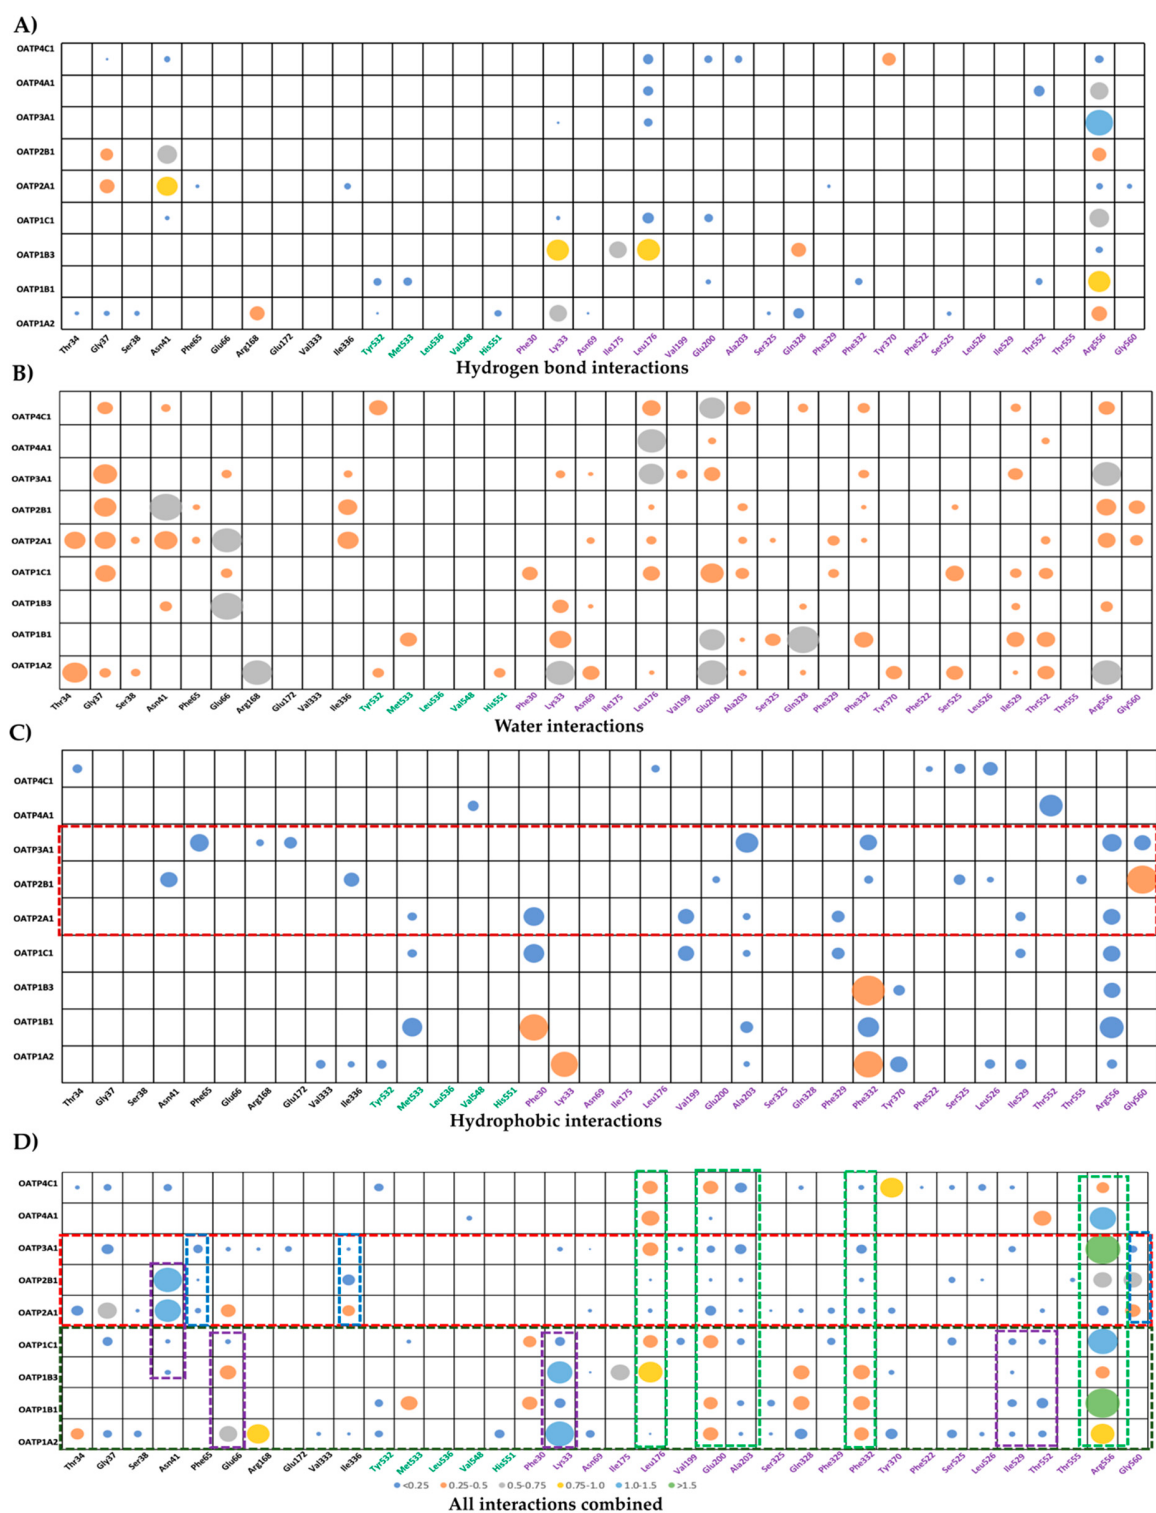

**Figure S15:** Frequency of protein-ligand interactions along the molecular dynamics simulation trajectories are shown in bubble graphs, the residues are named according to OATP1A2, and the corresponding aligned residues could be referred from Figure 3B. E3S was docked and shown in all the above docking poses. A) Hydrogen bond interactions. B) Water mediated interactions. C) Hydrophobic interactions. D) All interactions combined (Hydrogen bond, water mediated, hydrophobic).

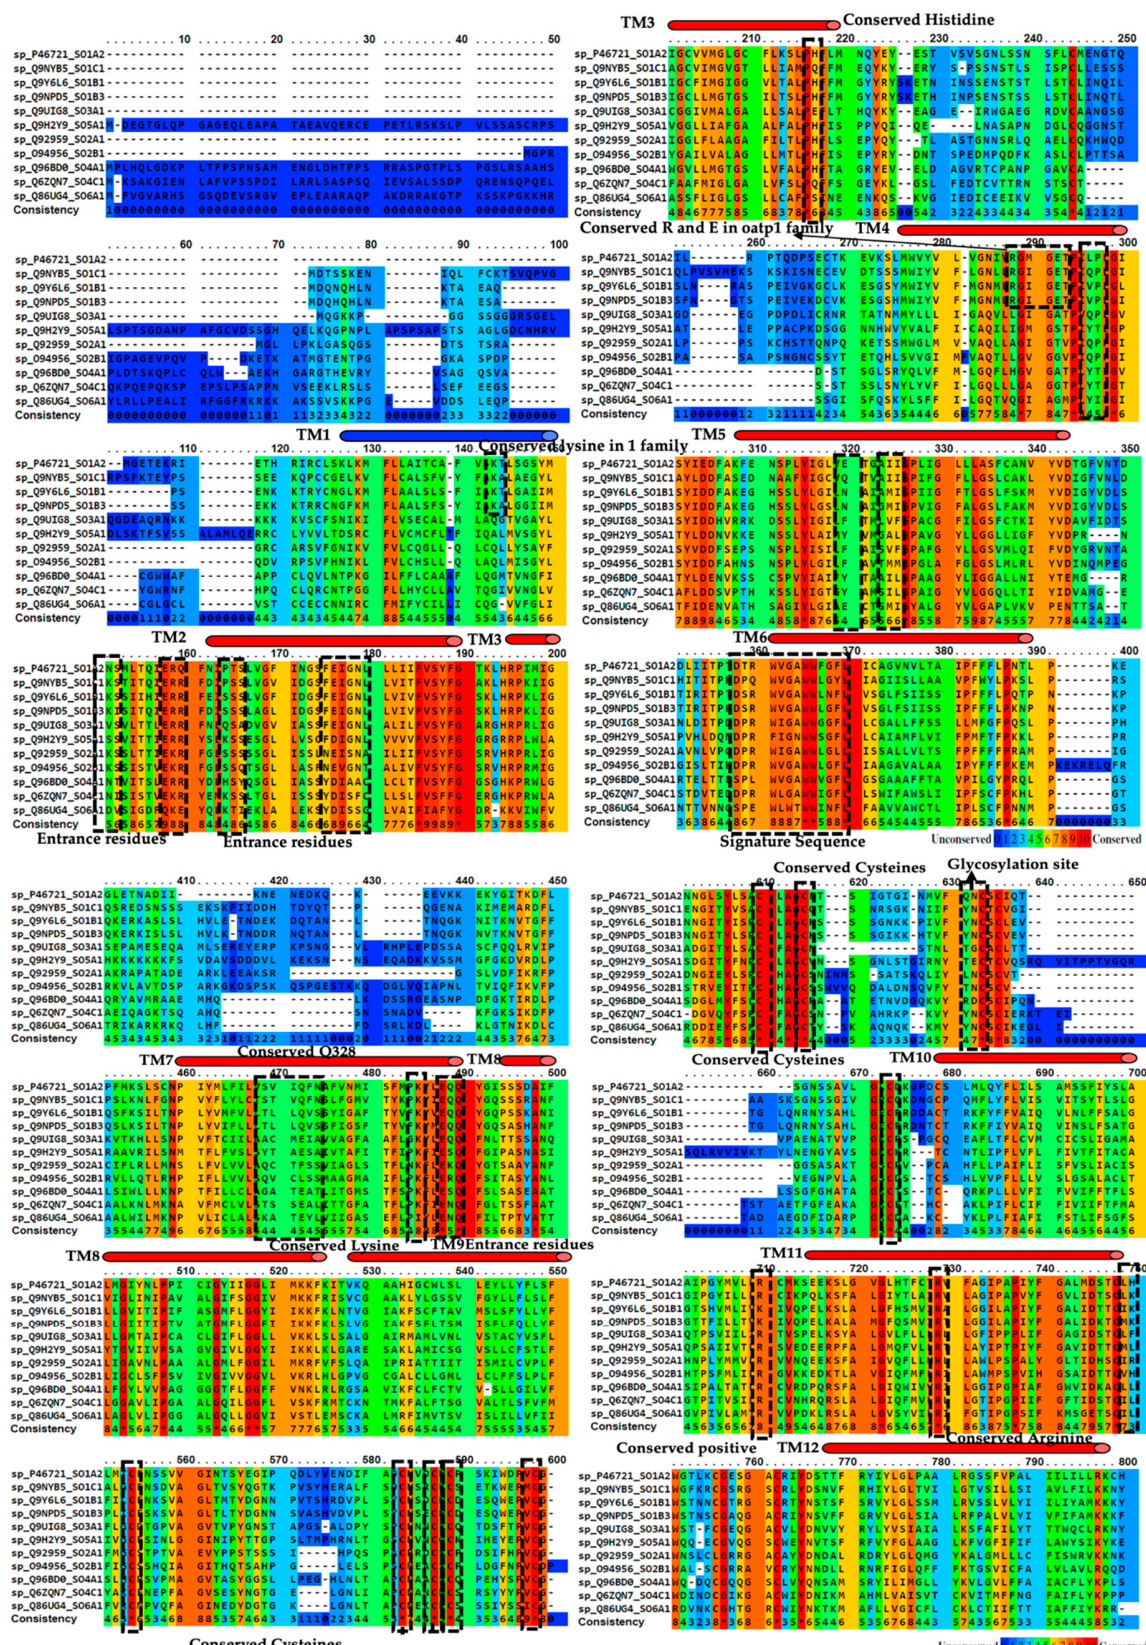

Figure S16: Multiple sequence alignment highlighting conserved residues and motifs

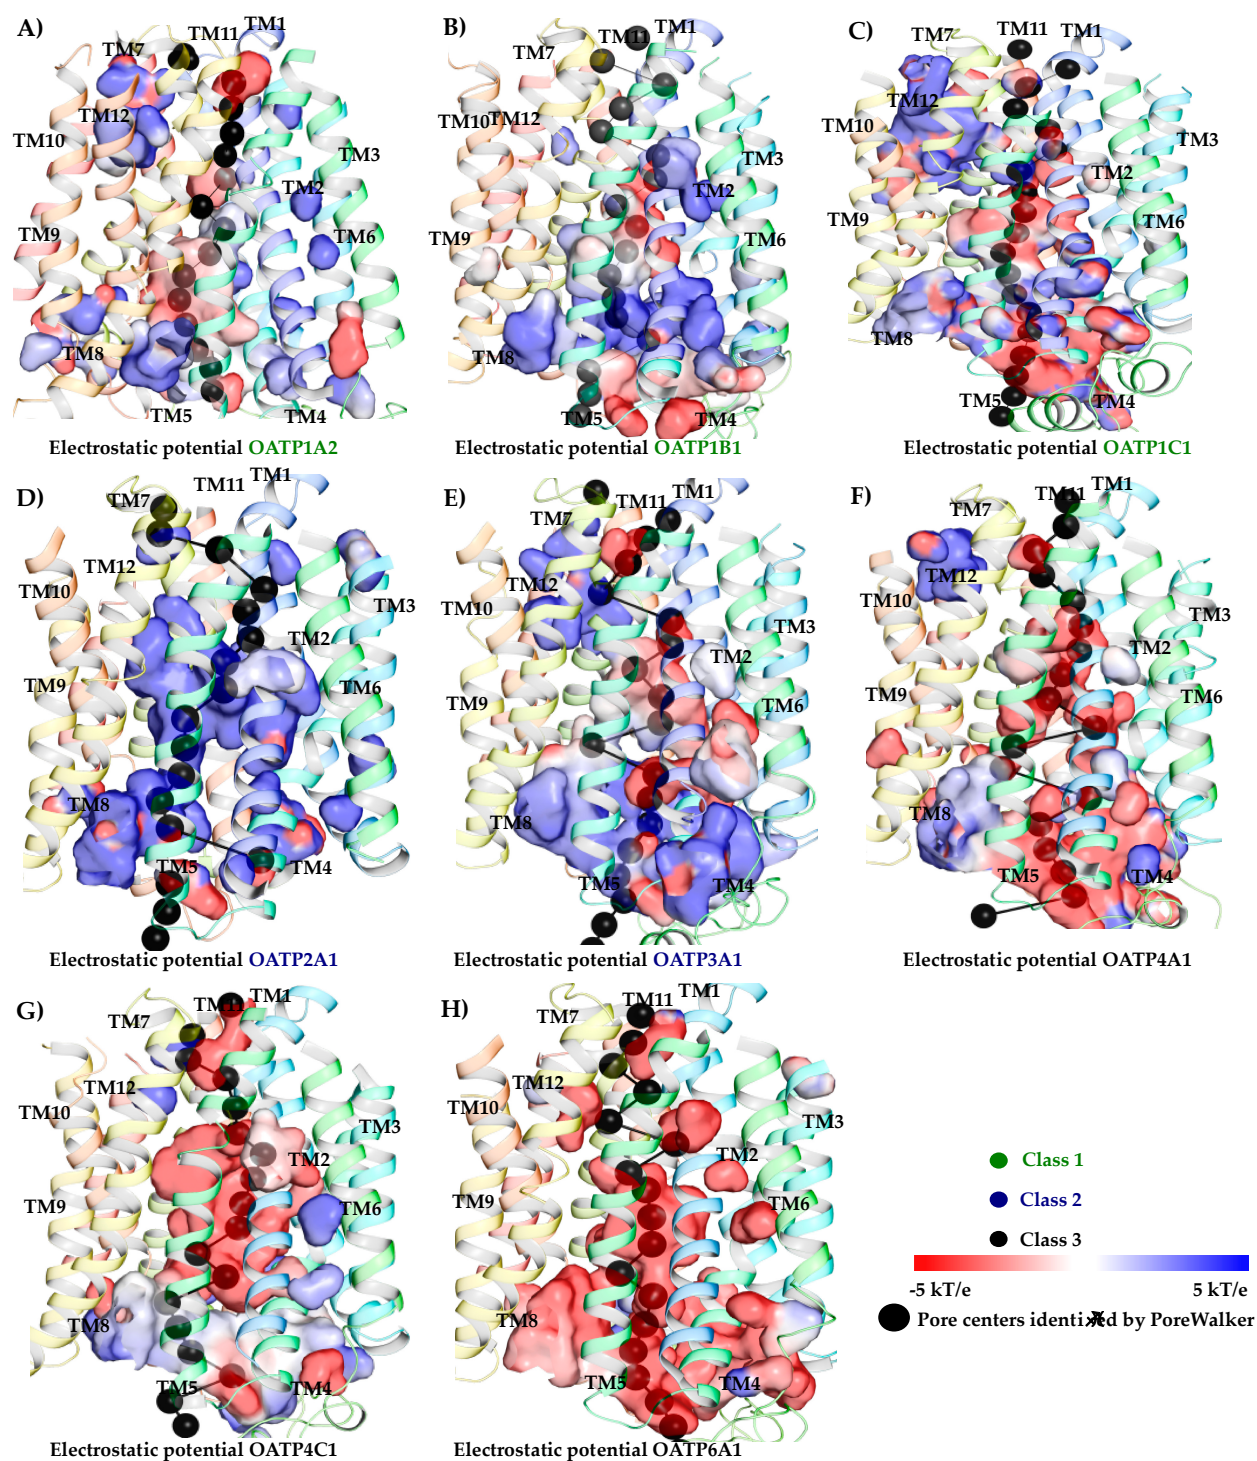

**Figure S17:** Electrostatic potential surfaces along the pore of Class 1(A-C), class 2(D,E) and class 3 (F-H) OATP transporters

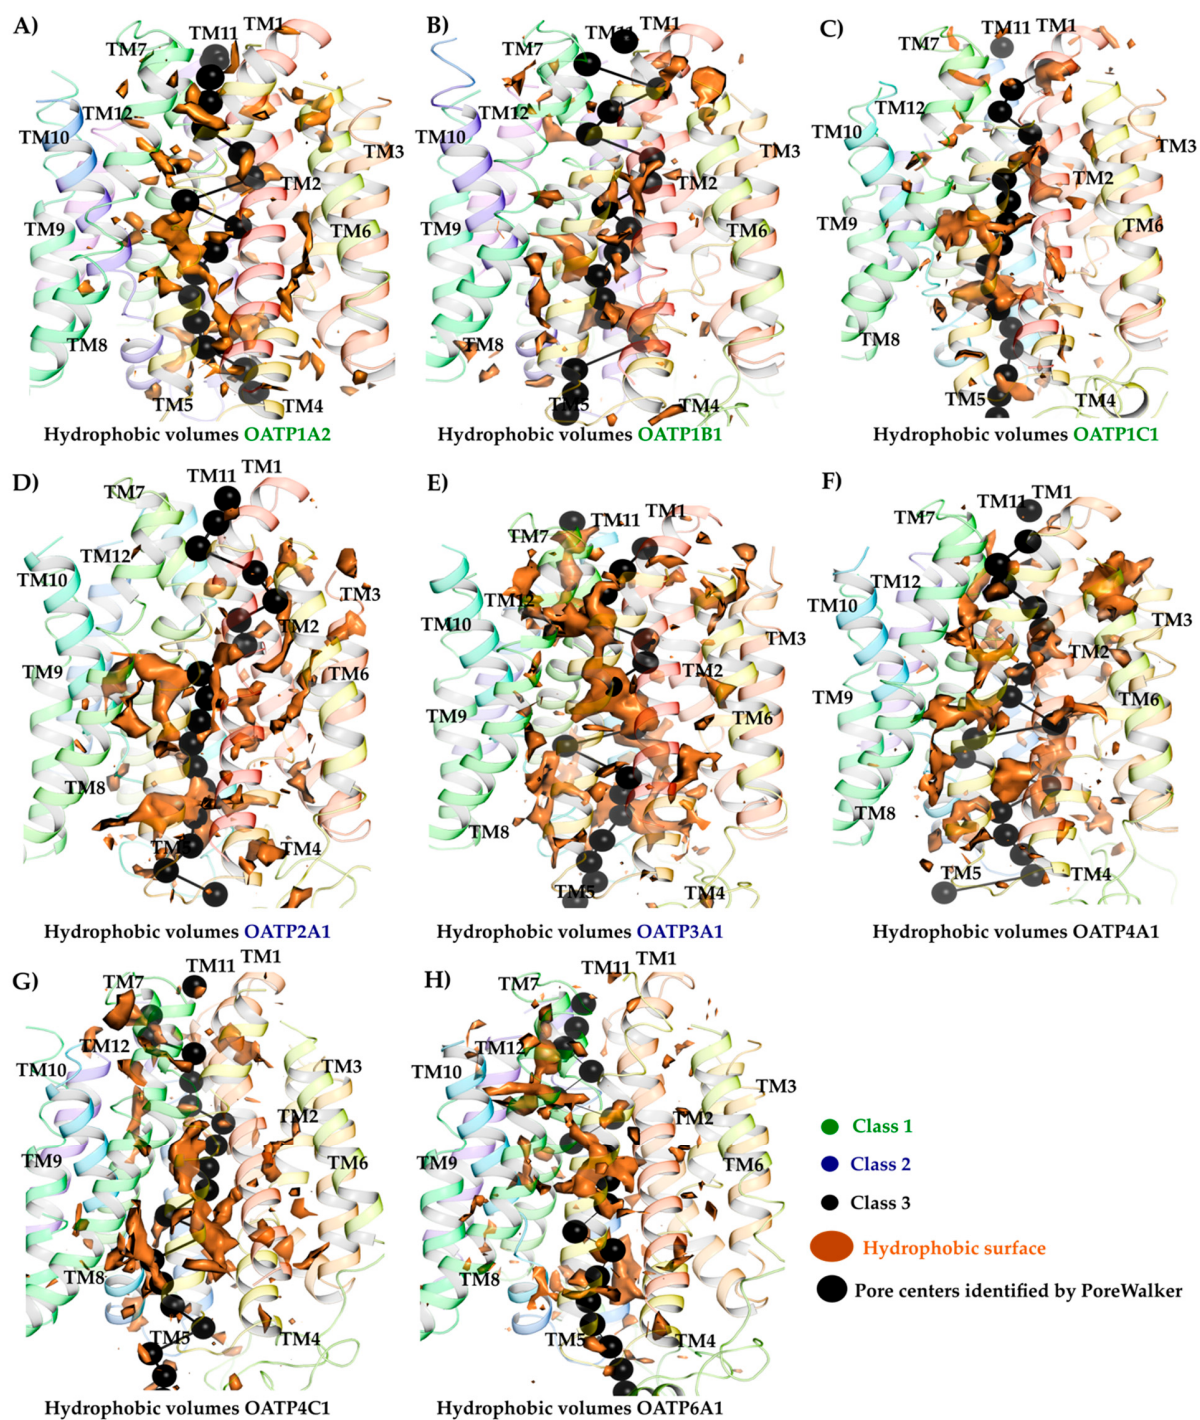

**Figure S18:** Hydrophobic surface volumes along the pore of Class 1(A-C), class 2(D,E) and class 3 (F-H) OATP transporters

A)

| Class  | Transporter | Hydrophobic_Volume |
|--------|-------------|--------------------|
| class1 | OATP1A2     | 796                |
| class1 | OATP1B1     | 759                |
| class1 | OATP1B3     | 1088               |
| class1 | OATP1C1     | 867                |
| class2 | OATP2A1     | 1125               |
| class2 | OATP2B1     | 1032               |
| class2 | OATP3A1     | 1527               |
| class3 | OATP4A1     | 1240               |
| class3 | OATP4C1     | 1161               |
| class3 | OATP5A1     | 1012               |
| class3 | OATP6A1     | 1008               |

B)

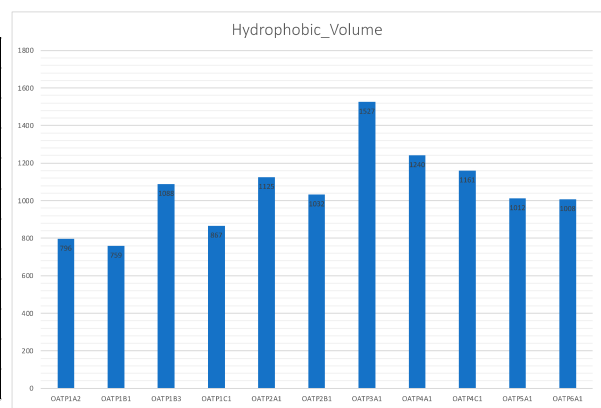

or

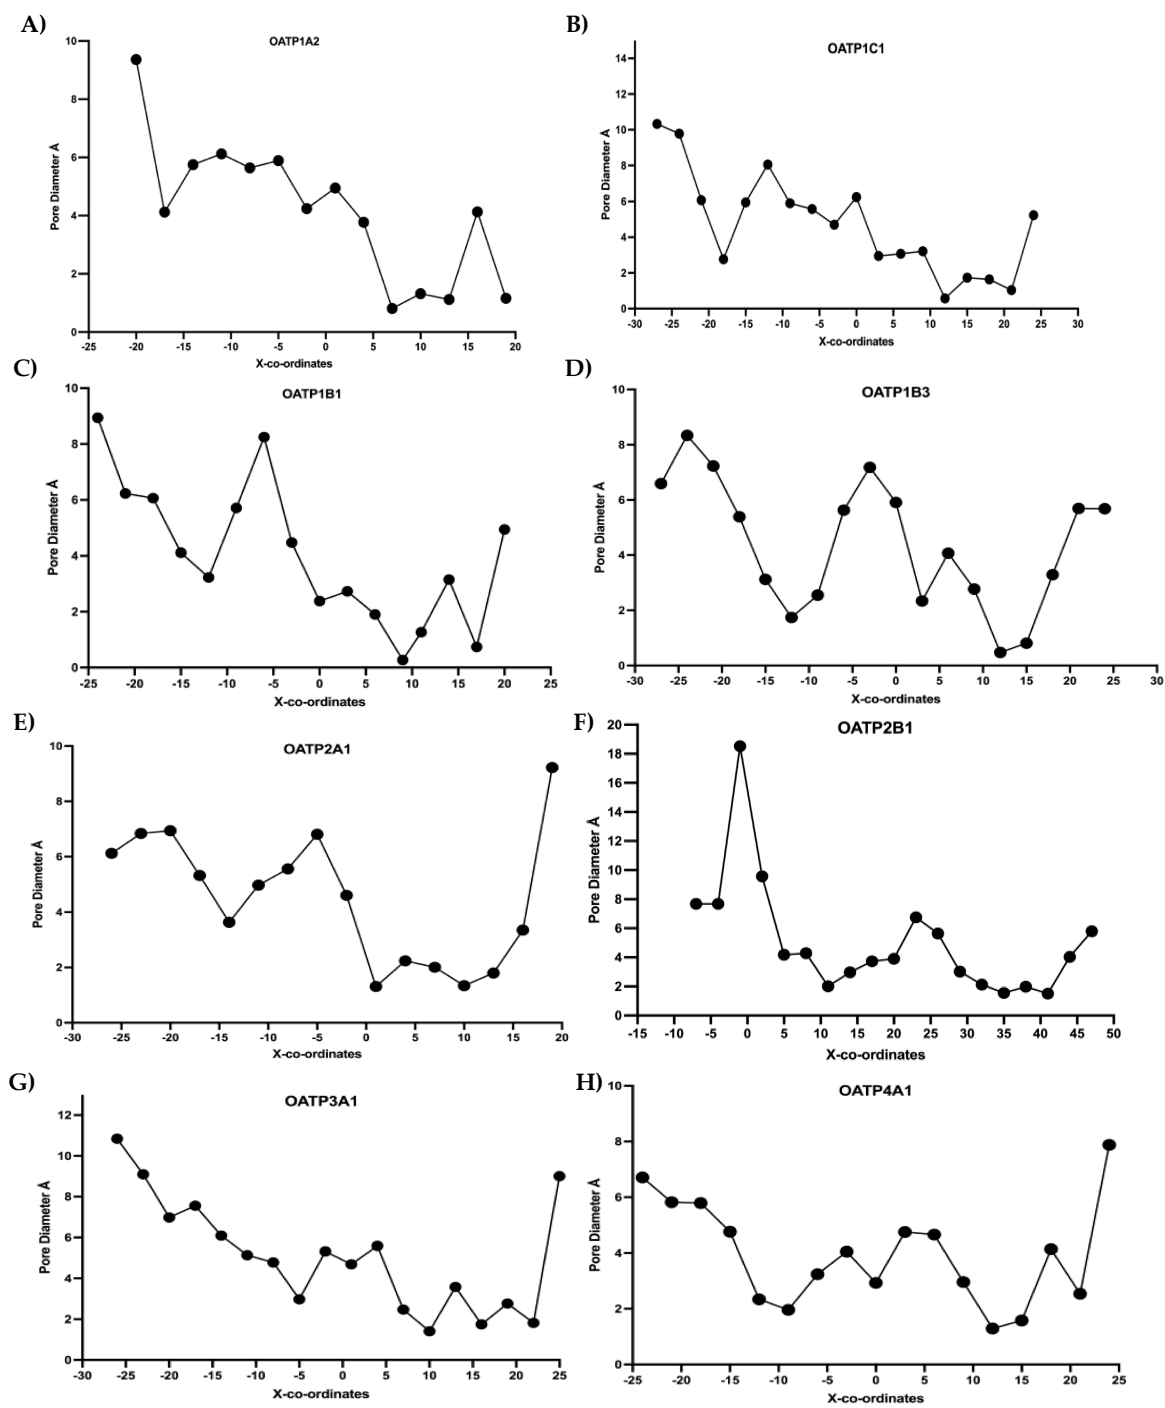

**Figure S20:** A-H) Pore diameter vs X-coordinates shown for their respective OATP transporters.

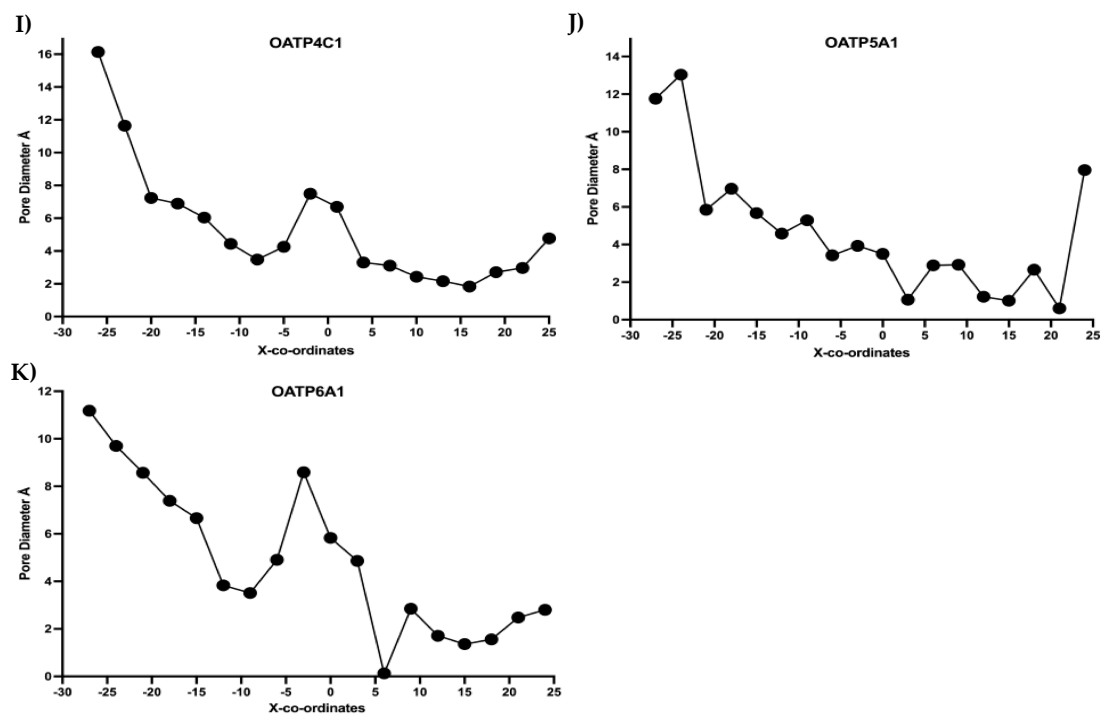

**Figure S21:** I-K) Pore diameter vs X-coordinates shown for OATP4C1, OATP5A1 and OATP6A1.
